# Supplementary material
Source: PubMed Central journal article supplement (PMC6248131)
Supplement: jama-320-1881-s003.pdf [file jama-320-1881-s003.pdf]

## Data Sharing Statement

Perkins GD, Mistry D, Gates S; Breathe Collaborators. Effect of protocolized weaning with early extubation to noninvasive ventilation vs invasive weaning on time to liberation from mechanical ventilation among patients with respiratory failure: the Breathe randomized clinical trial. *JAMA*. doi:10.1001/jama.2018.13763

### Data

**Data available:** Yes

**Data types:** Deidentified participant data

**How to access data:** breathe@warwick.ac.uk

**When available:** With publication

### Supporting Documents

**Document types:** None

### Additional Information

**Who can access the data:** We shall make data available to the scientific community with as few restrictions as feasible, while retaining exclusive use until the publication of major outputs.

**T types of analyses:** For any purpose

**Mechanisms of data availability:** Requests should be directed to breathe@warwick.ac.uk. To gain access, data requestors will need to sign a data access agreement.

**Any additional restrictions:** All data use must comply with the General Data Protection Regulation (GDPR).

This supplementary material has been provided by the authors to give readers additional information about their work.
